# Supplementary material
Source: publisher figshare collection journal article supplement (https://acs.figshare.com/ndownloader/files/3976399)

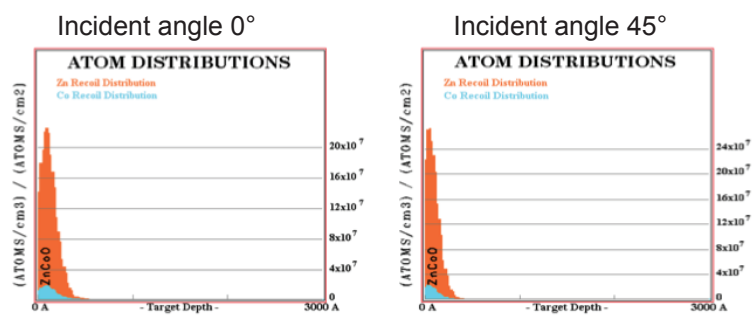

**Figure S7**

Supplement: Supplementary file 1 [file 3976399]
